# Supplementary material for: 鄭声の概念の生成過程-上-春秋思想との関連に於て
Source: Royal Society of Chemistry journal article supplement (doi:10.1039/c7fo01423f), 1979-01-01
Supplement: c7fo01423f3.xlsx [file c7fo01423f3.xlsx]

## Sheet: Matrix for Data Mining Analyses
ESI Table 1 Consumption, macro- and micro-nutritional composition, degree of processing, nutrient profile, satiety and glycemic potentials, textural characteristics, water activity, and shelf life of ready-to-eat foods
Food characteristics	NOVA technological groups	Consumption profile		Nutritional composition
				Energy	Proteins	Plant proteins	Animal proteins	Lipids	PLant lipids	Animal lipids	Total cholesterol	PUFA	MUFA	SFA	Total carbohydrates	Complex carbohydrates	Simple carbohydrates	Fibre	Calcium	Iron	Iodine	Magnesium	Phosphorus	Potassium	Sodium	Copper	Zinc	Manganese	Selenium	Retinol	b-carotene	Vitamin A (1/6)	Vitamin A (1/12)	Vitamin B1	Vitamin B2	Total vitamin B3/PP	Vitamin B5	Vitamin B6	Vitamin B9	Vitamin B12	Vitamin C	Vitamin D	Vitamin E	Vitamin K	Water	Omega 3 fatty acids	a-linolenic acid	EPA	DPA
Units		% population	g/day	Kcal/100 g	g/100 g	g/100 g	g/100 g	g/100 g	g/100 g	g/100 g	g/100 g	g/100 g	g/100 g	g/100 g	g/100 g	g/100 g	g/100 g	g/100 g	mg/100 g	mg/100 g	mg/100 g	mg/100 g	mg/100 g	mg/100 g	mg/100 g	mg/100 g	mg/100 g	mg/100 g	mg/100 G	mg/100 G	mg/100 G	mg/100 G	mg/100 G	mg/100 g	mg/100 g	mg/100 g	mg/100 g	mg/100 g	mg/100 G	mg/100 G	mg/100 g	mg/100 G	mg/100 g	mg/100 G	g/100 g	g/100 g	g/100 g	g/100 g	g/100 g
Veal liver	1	5.5	30.8	142	25	0	25	3.96	0	3.96	376	1.21	0.993	0	1.57	0	1.57	0	9	5.05	5	28.3	302	450	89	20.1	13.2	0.286	22	10500	43.5	10507	10504	0.147	1.72	18.8	1.81	1.03	404	71.4	13.2	2.52	0.71	1.6	67.7	0.041	0.041	0	0
Brussels sprouts	1	5.6	38.0	23.1	1.9	1.9	0	0.3	0.3	0	0	0.16	0.02	0.06	3.2	0.3	2.9	1.6	36	1.2	1	20	56	317	21	0.06	0.32	0.21	1.5	0	465	77.5	38.8	0.11	0.08	0.61	0.25	0.18	85	0	61	0	0.9	84.18	89	0.105	0.105	0	0
Celery branch	1	5.8	26.4	14.4	0.83	0.83	0	0.16	0.16	0	0	0.08	0.03	0.04	2.4	0	2.37	1.6	53.3	0.42	0.3	9	25	284	83.1	0.06	0.08	0.12	1	0	348	58	29	0.04	0.05	0.32	0.2	0.09	16	0	5.05	0	0.28	37.8	94.7	0	0	0	0
Coquille Saint-Jacques, nut	1	6.1	21.4	83.3	17.45	0	17.45	1.005	0	1.005	40.1	0.274	0.0642	0.144	1.128	0.478	0.65	0	93.95	0.87	35.3	47.7	224.5	390	164	0.0515	2.255	1.8	14.7	8.5	0	8.5	8.5	0.026	0.094	1.935	0.2755	0.117	14.5	3.495	0	0	1.105	0.1	79	0.2485	0.023	0.094	0.0175
Baked celeriac	1	6.8	29.7	28	0.96	0.96	0	0.19	0.19	0	0	0.09	0.04	0.05	2.8	0.6	2.2	2	26	0.43	1	12	66	173	61	0.04	0.2	0.098	0.4	0	12.3	2.05	1.03	0.03	0.04	0.43	0.2	0.1	20	0	4.8	0	0.4	41	96	0	0	0	0
Mushrooms	1	7.4	28.8	23.3	2.9	2.9	0	0.5	0.5	0	0	0.2	0.006	0.1	0.4	0.2	0.21	1.9	7.5	0.9	1	9	72	318	11.2	0.17	0.6	0.027	3.4	0	0	0	0	0.08	0.4	3.61	0.34	0.1	26.3	0	5	0.2	0.065	0	93.1	0.001	0.001	0	0
Lean fish	1	7.5	38.5	102	20.1	0	20.1	1.02	0	1.02	68.8	0.41	0.3	0.21	0	0	0	0	62	0.4	30.9	27	240	360	105	0.026	0.5	0.01	22.1	2	0	2	2	0.05	0.08	1.7	0.24	0.19	8	2.1	0	0.86	0.48	0.1	76.9	0.317	0.0017	0.1	0.017
Beef, steak, roast beef and entrecote	1	8.1	34.3	170.3	25.5	0	25.5	8.7	0	8.7	70	0.291	3.04	2.7	0	0	0	0	8.2	2.71	6	27	203	384	74	0.096	5.4	0.013	10.2	0	0	0	0	0.07	0.22	5.2	0.649	0.37	14.3	2	0	0	0.21	1.1	64	0.0427	0.035	0	0
Mango	1	8.2	27.9	56.3	0.6	0.6	0	0.32	0.32	0	0	0.06	0.12	0.07	12.5	0.3	12.2	2.1	12	0.35	0.9	11	14	147	2	0.11	0.07	0.16	0.6	0	499	83.167	41.58	0.04	0.05	0.54	0.16	0.13	38.7	0	32.4	0	1.08	4.2	82.1	0.043	0.043	0	0
Cooked cabbage	1	8.5	39.0	14.3	1.2	1.2	0	0.3	0.3	0	0	0.2	0.03	0.04	1.7	0.1	1.6	2.71	31	0.2	0.9	8	15	99	8	0.01	0.2	0.15	0.3	0	200	33.33	16.67	0.06	0.04	0.26	0.13	0.1	28	0	20	0	0.2	60	93.5	0.144	0.144	0	0
Cooked lamb/mutton meat	1	8.7	22.6	230	22.6	0	22.6	15.5	0	15.5	83	0.886	4.28	7.37	0	0	0	0	19.7	2.4	5	20.1	177	333	120	0.077	3.02	0.008	10.4	0	0	0	0	0.1	0.21	5	0.55	0.2	3	1.7	0	0	0.16	4.1	60.6	0.061	0.042	0.003	0.016
Fatty fish	1	9.3	18.8	196	24.3	0	24.3	11.2	0	10.8	50.5	3.3	3.84	3.07	0	0	0	0	15	1.43	32	64	270	357	141.127	0.09	0.77	0.02	38	12	0	12	12	0.113485	0.294445	7	0.88	0.46	4	12	0	7.5	1.28	0.4	64.5	1.557	0.075	0.504	0.116
Roasted poultry meat	1	9.3	32.7	190	25.5	0	25.5	9.785	0	9.785	92	1.965	4.6955	2.845	0	0	0	0	12.5	1.305	5	22.5	179	235.5	84.5	0.0775	2.48	0.019	19.05	25.5	0	25.5	25.5	0.068	0.201	6.3575	1.004	0.355	7.665	0.33	0	0.27	0.26	2.65	64.585	0.1815	0.1045	0.011	0.0165
Oleaginous nuts	1	9.7	9.4	593	23.6	23.6	0	52.9	52.9	0	0	10.5	35.3	4.33	5.6	1.6	4	7.6	136	3.66	2	168	425	683	1.61	1.07	2.92	2.32	2.2	0	1	0.167	0.083	0.3	0.15	2.1	0.81	0.41	117	0	0.2	0	24.1	0	2.6	0.0492	0.0492	0	0
Cooked white beans	1	9.8	40.2	102.52	8.41	8.41	0	0.32	0.32	0	0	0.15	0.03	0.09	16.5	15.6	0.9	6.3	39.3	2.7	3	25.5	100	480	6	0.159	0.659	0.5	2.2	0	0	0	0	0.118	0.046	0.14	0.229	0.09	81	0	0	0	0.145	3.5	67.7	0.073	0.073	0	0
Omelette	1	9.9	41.6	213.134	13.2827	0.92617	12.3565	16.6304	7.47979	9.15062	345.73	3.44791	5.54718	4.88964	2.57781	1.16508	1.41273	1.229	152.842	5.63961	52.2973	24.8938	166.827	227.007	192.31	0.0970688	1.19546	0.45106	11.1759	110.454	279.179	156.987	133.716	0.06933	0.346499	0.437566	1.17167	0.206988	56.4705	0.90698	7.771	1.4368	2.77405	264.966	64.5085	0.247302	0.173666	0.002694	0.012572
Chard	1	10.1	48.3	16.4	1.88	1.88	0	0.08	0.08	0	0	0.02	0.01	0.01	2	0.9	1.1	2.1	66.9	2.26	0.4	22.9	33	549	208	0.11	0.32	0.33	0.9	0	3652	608.67	304.33	0.03	0.08	0.36	0.16	0.08	9.5	0	18	0	1.89	327.3	92.6	0.0021	0.0021	0	0
Cooked wholemeal pasta	1	10.6	52.6	92	5.2	5.2	0	0.94	0.94	0	0	0.37	0.13	0.17	15.8	15	0.8	3.7	22.8	1.3	1	36.7	86	70.4	3.5	0.17	1	1.14	25.9	0	2	0.33	0.167	0.05	0.12	0.22	0.34	0.05	5	0	0	0	0.05	2.6	63.2	0	0	0	0
Mussel	1	11.8	30.5	115	19	0	19	2.99	0	2.99	38	0.36	0.37	0.38	3.1	0	3.1	0	78.6	10.2	352	64.4	221	247	409	0.17	1.82	0.3	21.2	84	0	84	84	0	0.2	1.6	0.4	0.09	42	10.2	4	0	3.5	0.1	70.3	0.257	0.012	0.082	0.013
Olives	1	12.1	7.3	127.5	0.945	0.945	0	13.6	13.6	0	0.05	1.375	8.94	1.585	0.27	0	0.27	8.95	59.7	2.13	4.5	44.7	10.3	23.65	1283	0.18	0.18	0.05	1.55	0	221.5	36.915	18.4585	0.0115	0.0035	0.13	0.015	0.0195	2.35	0	0.45	0	2.495	1.4	73.6	0.0985	0.0985	0	0
Cooked fennel	1	12.1	49.9	8.62	1.13	1.13	0	0.1	0.1	0	0	0.07	0.004	0.03	0.8	0.3	0.5	2	43.7	0.2	10	10.8	17.3	270	125	0.129	0.164	0.101	1	0	14	2.33	1.167	0.024	0.02	0.36	0.15	0.116	24.9	0	1.6	0	0.32	25.4	94.4	0.035	0.035	0	0
Rabbit meat	1	14.0	29.3	167	20.5	0	20.5	9.2	0	9.2	75.9	2.06	2.64	3.42	0.5	0	0.5	0	31.9	0.9	3	31.5	200	340	63.2	0.06	1.79	0.01	30.6	0.3	0	0.3	0.3	0.1	0.21	9	0.5	0.13	2.1	2.2	0	0.2	1.22	1.6	68.2	0.43	0.43	0	0
Cooked pepper	1	14.6	25.8	26.5	0.92	0.92	0	0.4	0.4	0	0	0.138	0.011	0.0455	4.8	0.1	4.7	1.2	9	0.46	1	10	18	166	2	0.07	0.12	0.12	0.1	0	750	125	62.5	0.06	0.03	0.48	0.08	0.23	16	0	74.4	0	0.8	5.11	91.9	0.0496	0.0496	0	0
Artichoke	1	15.0	39.7	18	3.1	3.1	0	0.18	0.18	0	0	0.07	0.006	0.04	1	0	0.99	5.4	49.5	0.89	0.5	30.8	63	342	51.6	0.08	0.26	0.15	0.2	0	106	17.67	8.833	0.03	0.04	1	0.34	0.06	50.5	0	5.5	0	0.19	14.8	84.6	0.009	0.009	0	0
Cooked pork meat	1	15.0	33.3	246.5	27.5	0	27.5	15.15	0	15.15	79.5	1.42	6.685	5.535	0	0	0	0	19.35	1.12	5	23.9	195	345	85.5	0.0665	2.93	0.0245	14.9	0.835	0	0.835	0.835	0.555	0.27	4.95	0.7	0.335	5	0.8	0.1	0	0.065	0.36	56.1	0.0875	0.0775	0.0025	0.005
Pineapple	1	15.0	34.4	47.3	0.54	0.54	0	0.24	0.24	0	0	0.08	0.02	0.01	10.2	0	10.2	1.6	20.9	0.24	1.2	20.7	11	160	1.1	0.06	0.07	2.52	0.33	0	47	7.83	3.916	0.08	0.02	0.33	0.17	0.09	13.5	0	21.3	0	0.1	0.7	85.9	0.034	0.034	0	0
Beetroot	1	16.1	25.0	41.7	2	2	0	0.14	0.14	0	0.2	0.05	0.02	0.02	8.1	0.5	7.58	2	17	0.59	0.3	16.2	20.1	232	26.2	0.06	0.28	0.41	0.3	0	21	3.5	1.75	0.01	0.02	0.21	0.12	0.05	38	0	4.3	0	0.15	0.2	88	0.004	0.004	0	0
Asparagus	1	17.1	54.0	16.8	2.4	2.4	0	0.22	0.22	0	0	0.09	0.007	0.05	1.3	0	1.3	2	20.9	0.91	0.5	8.87	54	224	14	0.1	0.33	0.08	2.8	0	604	100.67	50.333	0.16	0.13	1.08	0.22	0.07	101	0	7.7	0	0.38	50.6	92.6	0.025	0.025	0	0
Shallot	1	17.8	7.8	21.7	1.9	1.9	0	0.15	0.15	0	0	0.059	0.021	0.026	3.2	0	3.2	1.8	31	0.95	2	16.5	42.5	242	11	0.088	0.4	0.292	1.2	0	28	4.67	2.33	0.045	0.03	0.2	0.29	0.222	348	0	9	0	0.26	0.8	79.4	0.003	0.003	0	0
Baked potato	1	18.3	53.0	89.1	1.96	1.96	0	0.1	0.1	0	0	0.043	0.002	0.026	20.1	19.1	1	1.5	9.48	0.35	3	21.6	50	391	1.43	0.094	0.237	0.146	0.3	0	0	0	0	0.105	0.021	1.4	0.555	0.301	9	0	12.8	0	0.04	0.3	75.4	0.01	0.01	0	0
Raw onion	1	18.4	15.0	30.7	1.35	1.35	0	0.2	0.2	0	1.05	0.07	0.02	0.04	5.7	0	5.68	1.8	32.8	0.41	2	9.06	35.8	171	2.25	0.06	0.17	0.11	0.22	0	19.7	3.283	1.64	0.04	0.03	0.16	0.12	0.13	24	0	7.42	0	0.2	0.7	88.2	0.008	0.008	0	0
Pink shrimp	1	19.1	17.8	96.3	21.3	0	21.3	1.1	0	1.1	160	0.44	0.22	0.23	0.3	0.3	0	0	83.2	1.68	37	26.9	189	103	651	0.46	1.31	0.07	12.5	10	0	10	10	0.035	0.038	2.25	0.28	0.112	12.5	1.35	0.75	0.5	2.75	0.17	74.9	0.244	0.01	0.07	0.02
Black radish	1	20.5	26.4	34.45	1.78	1.78	0	0.2	0.2	0	0	0.09325	0.03325	0.0596	6.385	1.85	4.535	1.15	67.8	1.0015	1	27.5	42.45	398.5	9.445	0.029	0.1755	0.0715	0.35	0	1	0.1665	0.0835	0.08035	0.0715	0.4505	0.189	0.1235	43.75	0	65.5	0	0	1.3	86	0.0315	0.0315	0	0
Leek	1	21.1	30.4	20.2	0.8	0.8	0	0.2	0.2	0	0	0.11	0.003	0.027	3.8	0.3	3.5	2.4	40.2	0.5	0.2	7.4	17	87	15.8	0.07	0.16	0.12	0.8	0	400	66.66	33.33	0.026	0.02	0.2	0.07	0.11	69	0	5.6	0	0.78	25.4	91.5	0.055	0.055	0	0
Grapefruit	1	21.6	17.8	38.9	0.8	0.8	0	0.1	0.1	0	0.15	0.0433	0.0213	0.0287	6.2	0	6.2	1.3	23.3	0.082	0.465	9.15	14.3	167	2.65	0.0319	0.0612	0.018	0.1	0	281	46.83	23.417	0.0387	0.029	0.241	0.277	0.046	17	0	42.1	0	0.213	0	89.8	0.00945	0.00945	0	0
Chicken, white	1	22.6	34.4	124	22.2	0	22.2	3.93	0	3.93	71	0.85	1.34	1.01	0	0	0	0	13.7	0.74	5	26	480	287	51	0.04	0.86	0.02	25	4.67	0	4.67	4.67	0.15	0.09	10.7	1.36	0.54	8	0.35	17	0	0.28	0.3	73	0.087	0.035	0.009	0.017
Cauliflower	1	23.0	53.7	17.9	1.84	1.84	0	0.45	0.45	0	0.06	0.22	0.03	0.07	1.61	0.2	1.41	2.2	26.2	0.33	0.2	7.7	32	142	41.6	0.06	0.18	0.11	2.2	0	7	1.17	0.58	0.04	0.05	0.41	0.51	0.17	105	0	35.6	0	0.08	13.8	93.1	0.169	0.169	0	0
Broccoli	1	23.4	54.0	24.27	2.1	2.1	0	0.51	0.51	0	0.49	0.254	0.061	0.124	2.82	0.5	1.39	2.23	55.8	1	2	11.5	56	148	53	0.198	0.4	0.284	2.2	0	312	52	26	0.05	0.08	0.1	0.46	0.23	102	0	37.3	0	1.03	141.1	91.9	0.136	0.136	0	0
Baked tomato	1	26.1	36.6	30.2	1.41	1.41	0	0.5	0.5	0	0	0.205	0.074	0.069	5	0	5	2.8	32.7	1.13	2.2	24.3	38.7	799	242	0.218	0.28	0.164	0.6	0	1300	216.667	108.33	0.072	0.063	1.39	0.25	0.162	72	0	9.53	0	2.3	2.8	89.5	0.0093	0.0093	0	0
Avocado	1	27.0	38.0	137	1.9	1.9	0	13.9	13.9	0	0	1.48	9.83	1.83	0.8	0.11	0.66	5.6	10.7	0.77	1.2	27.1	43.3	420	0.95	0.28	0.48	0.23	0.4	0	81	13.5	6.75	0.06	0.13	1.37	1.23	0.36	79.3	0	11.3	0	1.34	21	76.1	0.09	0.09	0	0
Raw carrots	1	28.0	33.0	32	0.8	0.8	0	0.26	0.26	0	0.1	0.176	0.00461	0.0592	6.0246	0.7489	4.5197	2.0468	26.3673	0.281	1.4801	11.9	20.4	227.192	93.8	0.0382	0.216768	0.146414	0.8281	0	6534.34	1089.06	544.528	0.052	0.04159	0.9065	0.25615	0.123	47.119	0	3.642	0	0.56	13.2	89.4	0.0218	0.0218	0	0
Garlic	1	28.8	3.5	92.6	7.1	7.1	0	0.5	0.5	0	0	0.24	0.01	0.08	14.9	13.4	1.28	1.8	98.7	1.22	2.3	20.7	153	446	13.4	0.2	0.86	1	5.1	0	0	0	0	0.16	0.07	0.5	0.59	0.8	4	0	19.7	0	0.01	1.7	62.2	0.02	0.02	0	0
Cucumber	1	30.1	40.0	9.8	0.59	0.59	0	0.16	0.16	0	0	0.003	0.002	0.013	1.5	0.08	1.38	0.7	14	0.195	4	12	21	145	2	0.05	0.15	0.081	0.1	0	31	5.17	2.58	0.031	0.025	0.037	0.24	0.051	14	0	3.2	0	0.1	7.2	96.9	0.0002	0.0002	0	0
Lemon	1	30.3	17.3	18.9	0.8	0.8	0	0.45	0.45	0	0	0.13	0.02	0.06	2.9	0	2.9	2	16.5	0.38	0.9	8.9	17	146	1.1	0.03	0.07	0.01	1.39	0	11.5	1.916	0.958	0.05	0.02	0.17	0.21	0.07	18	0	51.7	0	0.52	0	90	0.038	0.038	0	0
Raw endive	1	31.8	21.1	11.3	1	1	0	0.1	0.1	0	0	0.04	0.002	0.02	1.6	0.05	1.5	2.1	26.1	0.19	0.1	8.66	22.9	191	3.7	0.06	0.15	0.13	0.2	0	37.5	6.25	3.13	0.07	0.03	0.23	0.17	0.05	56	0	3.4	0	0.1	115.5	95	0.006	0.006	0	0
Fried potatoes (homemade)	1	31.9	52.2	154.738	1.738	1.738	0	9.0973	9.0973	0	0	3.23665	4.20805	1.2649	16.473	15.84	0.633	1.7525	6.7365	0.38005	2.786	20.7757	40.4734	347.479	197.07	0.177795	0.27752	0.15996	2.03325	0	0.675	0.1125	0.05625	0.099545	0.0192	1.3017	0.468	0.2717	9.0325	0	11.805	0	3.17238	3.0892	69.3526	0.07217	0.07217	0	0
Hard egg	1	33.7	22.2	148	12.3	0	12.3	10.6	0	10.6	363	1.41	4.08	3.27	0.8	0	0.77	0	69.9	1.64	38.8	11.2	172	126	117	0.05	1.05	0.02	13	168	11	169.83	168.92	0.06	0.51	0.06	1.4	0.12	75	1.11	0	1.7	1.05	0.3	74.6	0.1	0.047	0.002	0.009
Kiwifruit	1	36.7	78.9	49.7	1.14	1.14	0	0.61	0.61	0	0	0.33	0.06	0.03	8.8	0.15	8.66	2.4	31.2	0.34	1.1	11.7	40.3	267	1.65	0.17	0.09	0.06	0.25	0	45	7.5	3.75	0.01	0.03	0.38	0.18	0.11	34.5	0	83.2	0	0.99	33	84.1	0.047	0.047	0	0
Raw tomatoes	1	38.4	47.2	19.55	0.855	0.855	0	0.365	0.365	0	0	0.1475	0.055	0.0495	3.05	0.03	3.02	1.4	9.955	0.4	1.85	10.55	23.5	289.5	8.05	0.048	0.162	0.098	0.2	0	792	132	66	0.055	0.034	0.8155	0.23	0.1105	19.1	0	22.35	0	1.115	5.6	93.15	0.0055	0.0055	0	0
Pear	1	41.3	83.6	45.1	0.385	0.385	0	0.22	0.22	0	0	0.0857	0.0453	0.026	10.4	0	10.4	3.03	7.64	0.103	1	7.82	11.4	130	1.23	0.0721	0.102	0.0343	0.15	0	6.5	1.083	0.542	0.025	0.035	0.192	0.345	0.066	6.15	0	5.3	0	0.465	4.9	85.1	0.0213	0.0213	0	0
Strawberry	1	41.3	89.4	26.7	0.7	0.7	0	0.3	0.3	0	0	0.155	0.04	0.015	5.3	0.04	5.26	2	13.2	0.5	1.7	12.1	21.9	153	1.1	0.04	0.06	0.33	0.1	0	24	4	2	0.024	0.022	0.39	0.12	0.05	69	0	57	0	0.14	2.2	91.3	0.065	0.065	0	0
Boiled potato	1	41.4	67.7	79.9	1.86	1.86	0	0.1	0.1	0	0	0.044	0.002	0.026	17.9	17.2	0.66	1.9	7.67	0.473	0.8	12	42	333	2.23	0.089	0.174	0.094	0.3	0	2	0.333	0.167	0.105	0.026	1.38	0.514	0.256	10.7	0	11.1	0	0.05	2.1	77.5	0.0102	0.0102	0	0
Steam potatoes	1	42.5	67.8	81.6	1.87	1.87	0	0.1	0.1	0	0	0.04	0	0.03	18.3	17.6	0.7	1.8	5	0.31	3	22	44	379	1.5	0.19	0.3	0.14	1.6	0	0	0	0	0.11	0.02	1.44	0.52	0.3	10	0	13	0	0.04	0.3	77	0.0093	0.0093	0	0
Orange	1	43.3	90.4	39.5	0.957	0.957	0	0.26	0.26	0	0.13	0.1	0.0633	0.0543	8.32	0	8.32	1.82	39	0.106	0.961	12.4	15.1	151	3.4	0.04	0.0732	0.0556	0.6	0	248	41.33	20.67	0.0777	0.0407	0.261	0.215	0.0807	38.7	0	39.7	0	0.395	3.8	87.1	0.0285	0.0285	0	0
Clementine/mandarin	1	47.0	69.7	44.6	0.7	0.7	0	0.2	0.2	0	0	0	0	0	10	0	10	1.4	18.7	0.35	0.4	7.6	15	145	3.17	0.04	0.59	0.02	2.2	0	334	55.67	27.83	0.08	0.04	0.3	0.2	0.04	26.4	0	41	0	0.55	0.08	85.6	0	0	0	0
Cooked pasta	1	49.5	67.2	115	3.95	3.95	0	0.58	0.58	0	0	0.25	0.09	0.12	23.5	23.1	0.4	1.6	7	0.5	1	20	50	49	1.3	0.15	0.6	0.26	1	0	0	0	0	0.03	0.01	0.4	0.06	0.02	4	0	0	0	0.08	1	68.9	0	0	0	0
Banana	1	49.6	64.3	88.1	0.9	0.9	0	0.22	0.22	0	0	0.07	0.01	0.05	20.2	3.8	16.4	1	4.8	0.32	2.9	29.7	16	413	0.7	0.11	0.16	1.1	0.3	0	40	6.67	3.333	0.04	0.07	0.61	0.28	0.47	27	0	11.7	0	0.29	0.5	75.2	0.026	0.026	0	0
Baked green beans	1	54.0	63.5	25.5	1.34	1.34	0	0.28	0.28	0	0.11	0.145	0.01	0.06	4.4	2	2.4	4.1	47.6	0.94	0.4	11.7	27	200	3	0.06	0.24	0.23	0.4	0	420	70	35	0.057	0.08	0.46	0.07	0.06	39	0	8.57	0	0.2	16	89.3	0.089	0.089	0	0
Apple	1	74.6	199.5	47.9	0.31	0.31	0	0.162	0.162	0	0	0.11	0.00708	0.0391	11.3	0	11.3	1.95	2.5	0.123	0.562	6.08	10	120	1.6	0.0402	0.04	0.0405	1.38	0	37.5	6.25	3.125	0.035	0.025	0.1	0.1	0.0677	3.86	0	6.45	0	0.59	3.7	85.3	0.0231	0.0231	0	0
Breadsticks	2	5.1	4.3	362.586	10.2459	10.2459	0	10.4568	10.4568	0	0.0075	1.68735	6.67931	1.49164	56.8792	56.5432	0.3353	4.2805	45.9117	1.58715	8.61111	30.8605	120.025	170.825	591.776	0.21215	1.14911	0.620455	6.942	0	3.654	0.60928	0.30422	0.4767	0.188895	4.06035	0.84294	0.16065	98.98	0.00245	0.0105	0	1.15145	3.9715	15.9882	0.086415	0.086415	0	0
Confit of duck/goose (homemade)	2	5.6	28.2	220	30.7	0	30.7	10.8	0	10.8	132	1.65	3.73	4.89	0	0	0	0	9.6	2.4	17	17.5	139	321	944	0.1	5.7	0.1	28	21	0	21	21	0.056	0.336	7.1	0.74	0.3	4.17	2.95	0	1.8	0.46	3.66	57.3	0.034	0.034	0	0
Croutons (homemade)	2	5.7	10.4	564	13.8	13.8	0	38	38	0	0	2.5	9.27	13.5	38.4	36.1	2.3	4.2	20	1.3	6.3	25	119	161	246	0.1	0.7	0.6	1	0	0	0	0	0.08	0.22	1.1	0.4	0.44	30	0	0	0	0	7.6	5	0.058	0.0568	0.0009	0
Wasa	2	5.8	15.7	312	10	10	0	1.9	1.9	0	0	0.6	0.3	0.5	63.7	55	8.7	16	40	3.1	5.7	100	325	500	400	0.4	3	2.475	2	0	10	1.67	0.833	0.22	0.1	2	0.676	0.2	40	0	0	0	0.5	6	6	0.075	0.075	0	0
Buckwheat pancake	2	6.0	24.1	224.859	6.40161	5.29291	1.1087	3.89684	1.30144	2.5954	36.827	0.631374	1.29039	1.67214	41.0417	40.089	0.95003	2.4402	22.6019	1.61356	5.3297	92.5833	147.121	204.684	405.901	0.30212	1.43309	0.75894	4.7223	29.112	4.979	29.9415	29.5272	0.208309	0.117253	2.76589	0.96905	0.279102	45.5258	0.09879	0	0.1773	0.22641	4.2337	44.098	0.042627	0.03791	0.000178	0.000801
Foie gras	2	6.6	12.5	516.5	7.15	0	7.15	53.45	0	53.45	717.5	0.8925	28.7	21.4	1.7	0	1.7	0	5.85	5.8	2	11.7	149.5	150	473	0.8	1.2	0.187	10	3416.5	0	3416.5	3416.5	0.065	0.5835	6.105	4.125	0.95	460	4.55	22.85	2.75	1.375	8.9	35.6	0	0	0	0
Spun cheese	2	7.1	15.1	241	18.4	0	18.4	17.5	0	17.5	65.5	0.62	5.33	10.7	2.5	0	2.5	0	403	0.2	15.9	25	365	67	200	0.01	2.9	0.008	8	187	80.5	200.42	193.71	0.04	0.35	0.19	0.2	0.07	11	2.2	0	0.13	0.33	1.6	57.7	0.3	0.3	0	0
Puffed cereal patties	2	7.4	13.7	348.275	12.4649	12.4649	0	4.1832	4.1832	0	0	1.76807	1.06688	0.697532	65.1882	59.9924	4.36082	6.91888	33.8259	4.49446	2.7296	140.747	399.573	456.401	243.55	0.370952	3.91794	3.57496	8.9376	0	1.328	0.22078	0.110722	0.741854	0.405206	4.78163	1.01957	0.785678	111.801	0.164838	0	0.0415	2.27752	13.2684	8.94917	0.148138	0.148138	0	0
Galette Bretonne St-Michel	2	8.0	9.2	440.721	7.1293	4.59	2.5393	21.7381	0.54	21.1981	75.434	1.07084	5.67743	14.4717	54.1342	31.32	22.8127	1.575	74.8493	0.70528	11.1468	17.0982	105.863	149.399	70.69	0.076393	0.625524	0.31207	5.2087	186.213	52.779	195.01	190.612	0.05816	0.14267	1.457	0.46525	0.06619	14.644	0.20201	0.4165	0.41098	0.73397	2.21745	14.7259	0.0979627	0.0953127	0.0001	0.00045
Dry goat cheese	2	8.2	12.8	451.1	30.52	0	30.52	35.59	0	35.59	105	0.845	8.117	24.609	2.17	0	2.17	0	895	1.88	30.6	54	729	48	346	0.627	1.59	0.252	5.5	478	91	493.17	485.58	0.14	1.19	2.4	0.41	0.08	4	0.12	0	0.7	0.31	3	29.01	0	0	0	0
Butter croissant	2	8.2	19.1	410.479	5.8828	4.1292	1.7536	26.9783	0.5022	26.4762	96.862	1.26457	7.12422	18.0415	36.041	27.324	8.71543	1.5108	43.5891	0.72379	9.2462	13.8227	84.425	116.399	256.494	0.066396	0.686768	0.274244	4.9468	233.068	66.111	244.086	238.577	0.08178	0.11338	1.46934	0.46677	0.06057	26.196	0.13262	0.2463	0.5109	0.8725	2.59745	28.4571	0.119605	0.115068	0.000128	0.000591
Swiss Cheese	2	9.4	13.1	365	24.5	0	24.5	29.9	0	29.9	95	0.81	7.9	18.8	0	0	0	0	788	0.3	31.4	32	499	98	648	0.09	5.1	0.03	7	200	100	216.667	208.33	0.04	0.3	0.1	0.32	0.07	20	1.5	0	0.24	0.5	2.46	38.6	0.151	0.208	0	0
Potato chips	2	10.8	7.5	504	6.1	6.1	0	34.4	34.4	0	0	3.61	21.6	7.94	42.4	41.8	0.6	4.1	31	1.61	87.5	50	155	1164	707	0.17	0.59	0.34	2.2	0	0	0	0	0.18	0.12	4.69	0.54	0.5	66	0	28	0	4.49	20.89	2.8	0.039	0.039	0	0
Duck breast (homemade)	2	12.4	27.5	191	26.7	0	26.7	9.05	0	9.05	106	1.4	3.1	2.9	0.6	0	0.6	0	5	4.8	15	31.2	273	390	435	0.5	2.1	0.1	34	16	30	21	18.5	0.38	0.88	13.5	3.4	0.98	20	3.3	3.5	0.93	0.46	5.1	62.9	0.098	0.062	0.003	0.019
Pickle	2	13.5	8.1	11	0.9	0.9	0	0.4	0.4	0	0	0.106	0.004	0.066	1	0.2	0.8	1.1	16.5	0.84	0.4	7.52	14.4	103	737	0.125	0.28	0.09	0	0	325	54.17	27.08	0	0.02	0.1	0.2	0.01	6	0	1	0	0.07	8.03	93.5	0.062	0.061	0.061	0
Veined cheese (or blue)	2	13.9	14.5	352.67	18.7	0	18.7	30.73	0	30.73	97	0.88	6.67	19.83	0	0	0	0	512.33	0.4	34.07	20.5	430	122.5	1203	0.08	3.7	0.02	5.9	152	25	162.61	157.3	0.04	0.5	0.9	1.5	0.14	78.33	1.12	0	0.23	0.55	2.54	46.1	0.264	0.264	0	0
Soft cheese	2	14.4	15.0	326.5	20.8	0	20.8	26.4	0	26.4	83.4	0.75	5.6	17	0.1	0	0.1	0	370	0.281	22.8	18.2	249	152	595	0.07	2.58	0.02	5.1	194	100	206.67	198.33	0.04	0.5	1.13	0.76	0.217	65	1.47	0	0.3	0.5	2.25	50	0.181	0.181	0	0
Rusk	2	15.5	13.9	394	10.1	10.1	0	6.85	6.85	0	0	0.8	2.5	2.7	72.9	66.7	6.2	3.9	40	1.3	3.5	29	124	161	477	0.18	0.95	0.72	1.7	0	0	0	0	0.34	0.15	1.3	0.1	0.09	21	0	0	0.44	2	4.6	4.7	0.056	0.048	0.005	0
Plain crepe (homemade)	2	15.5	33.9	321.542	7.66478	5.14628	2.5185	7.03095	5.8037	1.22725	37.15	2.24662	2.939	1.19275	56.8919	50.8859	6.003	1.9102	56.8465	0.87786	12.2304	16.2647	100.347	141.498	226.334	0.088049	0.66738	0.356732	6.3503	19.045	4.35	19.7695	19.4075	0.0595	0.13975	1.59403	0.48875	0.07175	17.67	0.21275	0.3425	0.1715	2.13135	1.70721	25.4836	0.0614575	0.0561575	0.0002	0.0009
Hard cheese	2	17.1	14.4	413.25	29	0	29	33.4	0	33.4	98.75	1.285	9.525	19.8	0.25	0	0.25	0	1003.5	0.33	32.3	39.9	606	68.45	328	0.236	4.42	0.03	6.9	262.5	91	277.668	270.082	0.05	0.39	0.1	0.43	0.08	17.5	1.55	0	0.685	0.56	2.7	35	0.3075	0.2955	0	0
Smoked fish	2	18.0	17.1	440.705	8.6	0	8.6	44.745	0	44.745	132.45	3.835	11.725	27.415	0.9	0	0.9	0	43.2	0.555	20.9	18.4	89	126	1196.5	0.0525	0.375	0.055	14.25	355	250	396.666	375.834	0.056	0.12	1.75	0.315	0.19	6.5	5.93	0	11.38	1.59	3.55	41.8	2.043	0.268	0.7745	0.06
Toasted bread	2	18.4	26.1	348.15	9.555	9.555	0	3.195	3.195	0	0	0.621	1.307	0.9995	70.3	65.75	4.55	4.31	52.6	1.265	5.15	34.75	113	210	715	0.145	0.8125	0.661	2	0	0	0	0	0.118	0.059	1.29	0.175	0.111	36.55	0	0	0	0.1375	2.72	8.675	0.03102	0.0273	0.001525	0
Egg pasta	2	21.5	53.0	124.9	6.455	2.765	3.69	3.586	0.406	3.18	108.9	0.598	1.287	1.065	16.69	16.17	0.511	1.12	25.87	0.842	12.34	17.36	86.6	72.1	36.01	0.12	0.735	0.188	4.6	50.4	3.3	50.949	50.676	0.039	0.16	0.298	0.462	0.05	25.3	0.333	0	0.51	0.371	0.79	70.61	0.03	0.0141	0.0006	0.0027
Dark chocolate	2	22.1	8.9	535.018	7.19811	6.71401	0	37.5625	34.2221	0	8.75	1.415	12.81	18.3	42.0767	3.64753	39.8792	7.03	103	10.85	3.39955	121	223.585	459.517	13	0.66424	1.46135	1.05	2.8	0	51.8436	9	4.5	0.12073	0.143829	0.728645	0.343075	0.254987	34.8043	0.0221806	0.125	1.81102	3.55	7.915	0.63	0.0775	0.077	0.00067321	0
French fries	2	24.4	28.0	203.409	1.5708	1.5708	0	15.069	15.069	0	0	5.3586	7.005	2.0802	15.372	14.784	0.588	1.512	4.333	0.2625	2.658	18.5115	36.9867	318.528	392.26	0.16183	0.25284	0.1239	2.30975	0	0	0	0	0.0924	0.0168	1.2096	0.4368	0.252	8.4	0	10.92	0	5.2536	3.5865	64.6803	0.112812	0.112812	0	0
Bayonne ham	2	27.4	16.7	236	27.4	0	27.4	13.8	0	13.8	66	1.4	6.2	4.7	0.54	0	0.24	0	16.3	1.4	1.2	25.5	235	437	2105	0.08	2.38	0	7	0	0	0	0	1.2	0.3	8.7	0.6	0.6	1.5	0.5	0	0.6	0.2	0	52.7	0.102	0.065	0.0075	0.02
Strasbourg sausage	3	5.0	17.2	287	12.5	0.58	11.92	25.9	0.03	25.87	70.5	3.09	11.3	9.18	1	0.484	0.516	0	25	1.1	7	13.1	173	192	834	0.0643	1.14	0.04	5.57	0	0	0	0	0.242	0.2	2.46	0.5	0.11	3.58	0.625	9.4	0.262	0.38	0.36	57	0.20407	0.2	0.00133	0
Lemon pie	3	5.1	38.0	356.177	5.00122	1.85972	3.1415	20.8087	0.22605	20.5826	137.477	1.1078	5.7403	13.2386	36.7737	15.4822	21.2842	0.6748	24.2271	0.70859	11.8057	8.57286	65.7644	77.3168	71.7901	0.045723	0.422408	0.129746	5.14686	195.168	47.9266	203.155	199.163	0.0333	0.13833	0.584495	0.454966	0.05281	23.3003	0.26973	5.474	0.6965	0.76909	1.7759	35.4726	0.099234	0.086355	0.000486	0.002187
Eclairs	3	5.2	27.1	270.234	5.24674	2.29124	2.9555	13.8143	2.2888	11.5255	100.492	0.792815	4.01663	8.46407	31.2044	13.5384	17.6611	1.2981	53.4285	1.44239	11.7196	19.8205	88.5787	149.546	305.849	0.098564	0.613541	0.193297	4.5055	115.465	32.5602	120.891	118.178	0.04395	0.13502	0.725843	0.444882	0.04844	16.2425	0.2507	0.34125	0.613	0.62135	1.57788	46.408	0.0700908	0.059235	0.0004235	0.00168
White sausage	3	5.3	28.7	229.719	14.6644	0.09872	14.5657	18.5238	0.01664	18.5072	126.371	1.52529	6.02238	9.65649	1.1038	0.016	1.0854	0.12385	30.585	0.676054	7.6592	16.9432	302.947	201.99	710.523	0.04001	0.832188	0.0238164	13.9075	76.4911	23.428	80.3955	79.3022	0.0759695	0.122205	4.06209	0.94635	0.22113	12.9812	1.07593	16.2407	0.2229	0.523288	0.88847	62.5807	0.191769	0.116323	0.0053075	0.0547995
Chorizo	3	5.4	8.8	477	23.8	0	23.8	41.9	0	41.9	108	3.79	20.1	15.7	1.15	0	1.2	0	35.8	2.8	7	27.5	253	479	1730	0.08	2.3	0.04	4.9	0	663	110.5	55.25	0.47	0.26	4.6	0.94	0.32	6.2	0.93	0	0.2	1.4	1.75	43.1	0.416	0.416	0	0
Smoked ham	3	5.6	10.6	303	23.8	0	23.8	23.6	0	23.6	70	3.5	9.24	8	0.2	0	0.2	0	7.5	0.5	12	18	156	250	1620	0.1	2.1	0.02	12	0	0	0	0	0.59	0.16	4.7	0.8	0.4	3	0.67	0	0.6	0.2	0.1	52.6	0.232	0.172	0.01	0.036
Merguez	3	5.8	22.8	296	19.8	0	19.8	23.4	0	23.4	71.4	0.97	9.6	12.3	1.6	0	1.6	1	22.9	1.8	25	21.1	128	762	891	0.1	2.8	0.1	5	23	560	116.33	69.666	0.05	0.2	4.7	0.26	0.24	6.68	1.45	1	0	1.7	10.4	52.4	0.174	0.152	0.009	0.012
Cracotte	3	6.1	10.1	351	9.6	8.89	0.71	3.9	3.89	0.01	0	1.36	1.57	0.819	74.2	64.2	8.47	3.85	42.3	1	10	29.8	131	254	599	0.129	0.639	1	7.4376	0	0	0	0	0.71	0.09	3.3	0.71	0.693	72.5	0	0	0	0.26	2.44	6.4	0.2797	0.268	0.0117	0
Macaroon	3	6.6	7.4	436.614	7.22414	5.8964	1.32774	26.4649	15.0152	11.4497	32.804	2.55514	10.3529	12.7323	42.3707	2.2372	40.1305	4.2874	68.297	3.93853	2.598	95.7043	158.896	407.816	68.4483	0.531097	1.27179	0.726918	2.3719	95.348	40.094	102.031	98.689	0.055636	0.17787	0.86594	0.17582	0.042236	12.8405	0.01138	0.072	0.6359	4.4749	2.6868	15.7988	0.0638113	0.080441	0.0007933	0
Wholemeal rusk	3	7.0	11.3	380.33	12.6	12.6	0	7.77	7.77	0	0	2.02	2.025	2.145	65	57	6.79	8.34	40.05	2.1	4	66.45	223	291.5	567.5	0.18	1.7	1.55	1.7	0	0	0	0	0.275	0.125	1.75	0.66	0.315	43.5	0	0	0	1.495	4.76	3.985	0.129	0.129	0	0
Wholemeal toast	3	7.4	15.6	269.6	16.27	16.27	0	4.07	4.07	0	0	0.74	1.972	0.922	41.96	36.19	5.77	9.2	130	2.96	3.9	99	303	326	583	0.67	2.15	2.545	52.6	0	2	0.33	0.166	0.376	0.284	5.732	0.722	0.237	52	0	0	0	0.63	9	24.25	0.03	0.03	0	0
Sponge cake-type Madeleine	3	7.5	17.9	426.642	5.22441	3.43991	1.7845	21.1541	0.4051	20.749	83.23	1.0266	5.61111	13.9895	53.8077	23.346	30.4593	1.18919	148.944	0.60211	8.61964	11.6975	151.57	93.4866	139.081	0.05748	0.445055	0.23055	4.35145	186.02	54.4589	195.096	190.558	0.03964	0.097435	1.05789	0.353545	0.050155	13.968	0.1448	0.501015	0.4455	0.69841	2.194	18.0025	0.09789	0.09365	0.00016	0.00072
Surimi	3	7.7	21.8	102	8.4	0	8.4	2.4	2.4	0	10.8	0.56	1.18	0.17	11.8	9.7	2.1	0	18.2	0.3	8	13.7	58	58	662	0.04	0.7	0.01	8.3	28	0	28	28	0.02	0.02	0.2	0.07	0.03	2	0.71	0	0	1.1	0.1	73.2	0.391	0.011	0.134	0.022
Gingerbread	3	7.7	17.0	341.836	4.41256	4.41036	0.0022	2.42475	2.42471	4.4e-05	0	0.489535	0.77496	0.807165	75.5709	41.0714	34.4995	1.7908	215.745	1.00909	4.536	12.7352	189.617	100.498	211.569	0.0735825	0.392799	0.444767	4.1545	17.16	9.9939	18.8258	17.9927	0.03361	0.037431	1.37522	0.219946	0.120771	8.1842	0	0.5593	0	0.381838	2.67268	14.1141	0.049368	0.049368	0	0
Shortbread	3	7.8	11.6	425.729	6.252	4.9376	1.3144	19.2313	0.576	18.6553	66.327	0.985569	5.00679	12.7397	56.89	33.7104	23.1782	1.684	124.888	0.71641	8.5362	13.9845	142.677	106.486	502.761	0.07554	0.51753	0.331978	4.9979	163.602	46.661	171.379	167.491	0.04908	0.08246	1.5165	0.36179	0.05867	12.927	0.10078	0.1445	0.36284	0.67976	2.03435	14.2674	0.0885991	0.0862141	9e-05	0.000405
Black bread	3	8.3	26.7	216.8	8.15	8.15	0	2.16	2.16	0	0	0.692	1.07	0.311	41.2	39.4	1.8	5.93	92.5	5.08	9.25	110	134	167	393	0.203	1.01	0.73	3.2	0	4	0.66	0.33	0.14	0.065	0.775	0.475	0.11	14.2	0.13	0.133	0	0.32	1.2	31.8	0.0695	0.0695	0	0
Fruitcake	3	9.3	17.6	392.536	3.88863	2.44482	1.4438	17.9476	0.304038	17.6436	83.678	0.890469	4.80148	11.7796	53.8216	15.5582	38.2602	0.993838	62.9851	0.620793	7.0199	9.47739	83.0824	96.4755	64.6073	0.0649911	0.33382	0.202424	3.64772	159.408	48.7938	167.54	163.474	0.0326025	0.079311	0.766799	0.283362	0.0457439	14.0557	0.11766	1.04262	0.4402	0.639988	2.02902	21.4113	0.0836875	0.0780695	0.000212	0.000954
Sorbet	3	10.4	32.2	109.453	0.309845	0.309845	0	0.211816	0.211816	0	0	0.0869489	0.0185379	0.0132008	26.523	0	26.523	1.72951	7.34548	0.164125	0.747796	6.16961	7.7525	72.823	1.92067	0.0419373	0.086288	0.116773	0.97909	0	13.28	2.21322	1.10678	0.014521	0.038993	0.128124	0.118205	0.0325116	6.96313	0	6.0067	0	0.273765	2.5693	70.7563	0.0258369	0.0258369	0	0
Clafoutis	3	11.1	43.9	189.059	4.30572	1.2772	3.02852	7.25055	0.1996	7.05095	88.5467	0.49994	2.23745	3.85639	26.6166	7.3754	19.235	0.944	35.149	0.587105	10.7344	9.46895	64.3539	140.788	71.5059	0.047649	0.388774	0.090833	3.74799	73.0132	46.5578	80.7691	76.894	0.035488	0.143655	0.42924	0.457571	0.055054	23.0504	0.26111	3.5512	0.39785	0.4326	1.3318	59.8718	0.068898	0.057874	0.000416	0.001872
Chocolate cake	3	11.1	26.3	416.532	5.3109	2.6746	2.6363	22.903	7.1836	15.7194	114.797	1.07235	6.63794	14.3212	47.2229	9.2438	37.9729	2.11972	213.976	3.0686	10.0448	27.2342	213.14	133.787	286.024	0.16312	0.639864	0.22615	4.57868	150.552	48.0517	158.56	154.557	0.04122	0.1388	0.5006	0.413642	0.05406	22.196	0.22755	0.058	1.1417	0.81885	3.14666	19.8444	0.092668	0.081571	0.0006188	0.001845
Soft bread	3	11.6	30.2	248.75	8.85	8.85	0	4.75	4.75	0	0.361	1.75	1.365	0.97	42.645	39.45	3.195	3.43	125.5	1.5	6.5	50.65	124.5	175	447	0.177	1.005	1.3525	4	0	1.5	0.25	0.0208	0.195	0.08	1.8	0.515	0.07	20.5	0	0	0	0.85	0.8	32.45	0.18425	0.184	0.00025	0
Meat dough	3	12.3	13.3	305.106	14.8285	0.597606	14.2309	25.4912	0.109275	25.3819	188.282	2.59342	9.10336	11.1981	4.1028	3.57308	0.52657	0.49995	29.4463	6.00678	12.2054	14.5535	143.489	161.987	634.421	0.26786	2.63834	0.213329	25.0994	1904.59	27.6583	1909.2	1906.95	0.138718	0.754875	3.55646	1.79966	0.264709	103.183	6.79139	8.0072	0.50613	0.576788	18.0456	51.4165	0.423163	0.210227	0.0290481	0.139013
Brioche	3	12.6	18.4	355.527	7.793	4.6074	3.1856	20.1574	0.5849	19.5725	132.381	1.1798	5.54039	12.5997	35.7269	29.2148	6.50502	1.8262	29.9475	1.08657	14.117	14.6509	103.573	128.571	191.388	0.077243	1.07716	0.29745	7.11122	186.137	45.9044	193.786	189.963	0.13937	0.20454	1.8843	0.783054	0.09053	62.1225	0.27188	0.0502	0.66935	0.8306	1.9328	33.4326	0.10164	0.089132	0.000472	0.002124
Wholemeal soft bread	3	12.9	42.5	219.9	12.95	12.95	0	3.35	3.35	0	0	0.6	1.597	0.747	34.49	28.92	5.57	6.8	107	2.43	2	82	202	248	472	0.377	1.8	2.135	40.3	0	2	0.33	0.166	0.353	0.216	4.714	0.686	0.209	50	0	0	0	0.55	7.8	38.58	0.02	0.02	0	0
Viennese brioche bread	3	16.4	25.7	326.922	8.075	5.955	2.12	12.5624	0.71485	11.8475	74.1875	0.852085	3.36044	7.7139	45.384	39.326	6.05425	2.1085	32.5806	0.94176	12.1208	15.6312	91.9908	127.561	220.428	0.087142	0.694202	0.390474	6.40235	111.787	29.9877	116.785	114.287	0.11507	0.13695	1.9744	0.558312	0.0814	31.2505	0.17285	0.164	0.37625	0.62685	1.5035	30.9299	0.069667	0.063042	0.00025	0.001125
Apple pie	3	16.8	55.0	260.459	2.47363	2.37913	0.0945	11.4723	0.32128	11.151	30.51	0.538795	2.95386	7.72239	36.8186	16.057	20.7615	1.39	9.6821	0.48763	2.58786	7.07931	26.99	70.1209	121.124	0.046021	0.209775	0.199439	2.25375	95.58	33.8825	101.227	98.4034	0.031184	0.0277	0.743216	0.135675	0.035243	5.518	0	0.506	0.1755	0.43186	1.55502	47.5154	0.051154	0.051154	0	0
Petit-beurre biscuit	3	19.8	9.6	416.034	6.3547	5.3754	0.9793	16.7752	6.1269	10.6483	45.107	2.66352	5.48094	7.96016	59.8914	36.6792	23.2107	1.8445	22.9363	0.75392	8.2028	13.4822	69.3932	99.8453	52.3245	0.0777005	0.520254	0.364063	5.43305	95.1007	27.4731	99.6795	97.3901	0.049365	0.068535	1.64995	0.348966	0.06087	13.199	0.077705	0.079	0.24029	2.42229	2.62475	14.8839	0.0974946	0.0949771	9.5e-05	0.0004275
White ham	3	21.3	22.4	119	20.45	0	20.45	3.865	0	3.865	53.2	0.423	1.595	1.23	0.545	0	0.4735	0	8.6	0.8	6	21.75	387	312.5	781.5	0.095	2.68	0.02	10	0	0	0	0	0.805	0.2	5.775	0.47	0.3625	1.15	0.3	7.95	0.3	0.17	0	73.25	0.0295	0.021	0	0
Wholemeal bread	3	35.5	61.8	251.65	8.965	8.965	0	1.55	1.55	0	0.6	0.6925	0.4865	0.338	45.585	43.85	1.785	5.4	91.95	2.76	14.5	58.5	165	219	606.5	0.19	1.675	1.79	4.5	0	2	0.335	0.1665	0.0874	0.0725	3.35	0.475	0.16	26.8	0.155	0	0	0.43	1.4	30.6	0.04115	0.04115	0	0
White bread	3	47.1	123.0	240.65	8.07	8.07	0	1.175	1.175	0	0.025	0.362	0.185	0.2335	49.4	47.2	2.2	3.165	39.6	1.17	6.325	23.95	83.55	113.85	620.5	0.1385	0.915	0.5575	5.03	0	0	0	0	0.125	0.065	1.075	0.3985	0.07	23.5	0	0	0	0.415	1.25	30.6	0.02765	0.02765	0	0
Crackers	3	6.5	6.3	475	8.3	7.75	0.55	17.5	17.07	0.43	0	1.6	4.6	10.3	71	64.4	6.6	2.6	72	2.9	8	29	108	152	1061	0.2	0.75	0.7	0	0	0	0	0	0.4	0.26	3.5	0.5	0.04	27	0	0	0	1.65	1.38	4.1	0.085	0.085	0	0
Swedish crispbread	3	8.7	15.1	382.7	9.35	9.35	0	8.19	8.19	0	0.8	1.47	3.38	3.01	67.9	58.8	9.1	5.4	42.2	1	9.8	23.4	120	163	431	0.18	3.5	0.7	10.1	0	50	8.33	4.17	0.2	0.07	1.4	0.52	0.14	21	0	0	0	0.63	5.01	5.06	0.461	0.461	0	0
[truncated: 26 more columns]
